# Supplementary material for: Many objective optimization algorithm based on mixed species particle flocking
Source: Springer Nature journal article supplement (doi:10.1007/s12652-022-03782-4), 2022-03-29
Supplement: 12652_2022_3782_MOESM1_ESM.pdf [file 12652_2022_3782_MOESM1_ESM.pdf]

Table 1: HV Indicator values of 6 algorithms on test problems MaF1- MaF10 , where the best mean for each problem is highlighted

| Function | Obj | KnEA                       | NSGA-III                   | MOEA/DD                    | SPEA/R                      | RVEA                       | MSPSO                      |
|----------|-----|----------------------------|----------------------------|----------------------------|-----------------------------|----------------------------|----------------------------|
| MaF1     | 2   | 3.423E+0(4.5623E-2)        | 7.685E+0(8.563E-2)         | 1.341E+0(3.2317E-2)        | <b>1.834E+0(4.020E-2)</b>   | 1.548E+0(2.36E-2)          | 1.673E+0(2.427E-2)         |
|          | 4   | 1.348E+0(3.156E-2)         | 2.514E-0(6.314E-2)         | 1.341E+0(3.23E-2)          | <b>2.450E+0(3.19E-2)</b>    | 2.082E+0(3.118E-2)         | 1.588E+0(2.510E-2)         |
|          | 6   | 6.861E+0(6.163E-2)         | 2.223 E-0(6.34E-2)         | 6.82E+0(1.271E-2)          | 1.66E+0(2.132E-2)           | <b>2.899E+0(1.331E-2)</b>  | 2.032E+0(2.181E-2)         |
|          | 8   | 4.1983E+1(1.926E-2)        | 4.56E+0(6.34E-2)           | 1.932+0(2.164E-2)          | 1.834E+0(4.020E-2)          | <b>1.981E+0(2.132E-2)</b>  | 2.134E+0(1.717E-2)         |
|          | 10  | 8.364E+1(1.586E-2)         | 2.485E+0(8.469E-2)         | 2.64E+0(3.52E-1)           | <b>1.532E+0(1.583E-1)</b>   | 2.6387E+0(6.578E-2)        | 3.579E+0(5.47E-2)          |
| MaF2     | 2   | 3.263E+0(2.331E-2)         | 6.434E+0(5.613E-2)         | 2.221E-1(3.147E-2)         | <b>1.6234E-1(2.02E-2)</b>   | 2.668E+0(3.16E-2)          | 1.322E+0(3.517E-2)         |
|          | 4   | 2.541E+0(2.556E-2)         | 1.254E-0(4.004E-2)         | 3.441E+0(3.201E-2)         | 2.416E+0(2.089E-2)          | 2.372E+0(3.48E-2)          | <b>2.018E-2(3.65E-3)</b>   |
|          | 6   | 2.226E-1(4.013E-2)         | 2.343 E-0(4.124E-2)        | 5.452E-1(3.126E-2)         | 2.506E+0(3.142E-2)          | 1.921E+0(2.361E-2)         | <b>2.345E-2(3.024E-3)</b>  |
|          | 8   | 5.221E+1(1.453E-2)         | 2.156E+0(4.234E-2)         | 3.914+0(3.764E-2)          | 1.446E+0(4.369E-2)          | <b>2.7181E-2(3.536E-3)</b> | 2.884E-20(1.446E-3)        |
|          | 10  | 1.641E+1(1.446E-2)         | 4.325E+0(6.335E-2)         | 3.614E+0(3.502E-1)         | 1.882E+0(2.643E-1)          | <b>1.864E-2(6.004E-3)</b>  | 2.667E-2(3.03E-2)          |
| MaF3     | 2   | <b>2.3180E-3 (1.78E-5)</b> | 7.5417E-2 (1.721E-1)       | 2.4914E-2 (2.123E-3)       | 4.9162E-3 (1.89E-4)         | 6.321E-2 (1.64E-1)         | 6.582E-3 (4.728E-4)        |
|          | 4   | 3.31427E+0 (3.68E-2)       | 8.21E-1 (4.289E-1)         | 1.173E-1 (5.68E-3)         | 2.8538E-1 (7.96E-3)         | <b>5.371E-2 (1.821E-3)</b> | 2.412E-1 (3.526E-2)        |
|          | 6   | 7.661E+0 (8.127E-2)        | 5.7183E-1 (2.35E-1)        | 3.8586E-1 (2.13E-2)        | 5.426E-1 (2.226E-2)         | <b>1.434E-2 (2.42E-3)</b>  | 4.890E-1 (1.826E-2)        |
|          | 8   | 2.184E+0 (1.424E-1)        | 1.876E+0 (2.932E-1)        | 1.061E+0 (2.103E-2)        | 9.791E-1 (5.14E-2)          | 2.529E-2 (1.631E-1)        | <b>8.6947E-1 (6.49E-2)</b> |
|          | 10  | 2.5870E+0 (1.01E-1)        | 1.7560E+0 (5.18E-1)        | 1.79E+0 (1.18E-1)          | 1.284E+0 (8.41E-2)          | 1.89E-2 (1.561E-1)         | <b>1.1988E+0 (5.41E-2)</b> |
| MaF4     | 2   | <b>5.1750E-3 (1.38E-6)</b> | 4.1369E-3 (1.76E-4)        | 8.2565E-3 (2.69E-4)        | 3.41E-2 (3.281E-1)          | 4.1603E-3 (1.39E-5)        | 6.7929E-3 (1.03E-3)        |
|          | 4   | <b>2.4911E-2 (2.82E-4)</b> | 2.8469E-2 (2.26E-3)        | 1.5966E-2 (1.04E-3)        | 4.5300E-2 (1.17E-2)         | 8.103E-3 (1.119E-5)        | 8.3933E-2 (2.52E-2)        |
|          | 6   | 2.537E-2 (2.54E-3)         | 8.712E-2 (1.144E-2)        | 1.766E-2 (1.76E-3)         | <b>2.3084E-3 (2.54E-4)</b>  | 3.165E-1 (7.18E-2)         | 2.106E-1 (4.23E-2)         |
|          | 8   | 3.20E-2 (3.378E-3)         | 6.095E-2 (3.765E-2)        | 2.241E-1 (3.86E-2)         | <b>2.37E-2 (1.43E-3)</b>    | 2.571E-1 (3.124E-2)        | 5.295E-2 (3.15E-2)         |
|          | 10  | 3.85E-2 (1.67E-3)          | 6.111E-2 (3.734E-2)        | 3.838E-1 (5.47E-2)         | <b>4.1898E-2 (6.112E-4)</b> | 2.1038E+0 (6.47E-1)        | 2.5135E-1 (4.31E-2)        |
| MaF5     | 2   | 6.8710E-3 (2.10E-4)        | 5.5751E-1 (3.28E-1)        | 8.8575E-3 (5.04E-4)        | <b>3.9883E-3 (2.70E-5)</b>  | 4.871E-1 (2.128E-1)        | 5.260E-3 (4.281E-4)        |
|          | 4   | 4.64E-1 (4.320E-3)         | 4.153E-1 (2.12E-1)         | 1.1443E-1 (6.24E-2)        | 2.3346E-1 (6.32E-2)         | <b>5.161E-1 (2.312E-3)</b> | 2.2611E-1 (3.164E-3)       |
|          | 6   | 4.35E-1 (1.127E-1)         | 5.38E-1 (8.29E-2)          | 2.15E-1 (1.867E-3)         | 2.1706E-1 (3.87E-3)         | <b>2.5392E-1 (1.42E-4)</b> | 2.769E-1 (3.299E-3)        |
|          | 8   | 3.7719E-1 (2.60E-2)        | 6.05E-1 (6.185E-2)         | 3.67E-1 (1.296E-3)         | 3.936E-1 (3.42E-3)          | <b>3.3896E-1 (2.62E-3)</b> | 3.129E-1 (3.245E-2)        |
|          | 10  | 6.536E-1 (1.49E-2)         | 7.380E-1 (3.64E-2)         | 3.4736E-1 (1.38E-3)        | 4.1024E-1 (2.19E-2)         | <b>3.2591E-1 (2.04E-3)</b> | 2.355E-1 (1.687E-3)        |
| MaF6     | 2   | 4.250E1 (2.7E1)            | 2.663E1 (6.18E2)           | 4.976E1 (3.34E1)           | <b>1.449E1 (4.49E3)</b>     | 5.382E1 (2.78E1)           | 1.913E1 (1.01E1)           |
|          | 4   | 6.330E1 (3.41E1)           | 3.973E1 (7.01E2)           | 7.018E1 (2.86E1)           | 3.147E1 (3.92E2)            | 5.857E1 (3.05E1)           | <b>2.154E1 (9.75E2)</b>    |
|          | 6   | 6.035E1 (1.67E1)           | 9.541E1 (1.62E1)           | 6.672E1 (1.012E1)          | 3.685E1 (1.61E2)            | 6.498E1 (1.6E1)            | <b>3.007E1 (4.63E3)</b>    |
|          | 8   | 6.459E1 (1.18E1)           | 1.175E+1 (2.24E1)          | 9.199E1 (6.11E2)           | 5.400E1 (2.05E2)            | 7.600E1 (8.64E2)           | <b>4.020E1 (3.52E3)</b>    |
|          | 10  | 6.267E1 (9.24E2)           | 8.66E1 (2.74E1)            | 1.074E+0 (6.19E2)          | 8.178E1 (4.15E2)            | 8.311E1 (8.74E2)           | <b>4.928E1 (3.29E3)</b>    |
| MaF7     | 2   | 6.417E-2 (2.721E-1)        | <b>4.2310E-3 (1.64E-5)</b> | 5.582E-3 (4.28E-4)         | 3.8162E-3 (1.749E-4)        | 5.231E-2 (1.56E-1)         | 3.484E-2 (2.223E-3)        |
|          | 4   | 1.614E+0 (3.81E-2)         | 7.21E-1 (4.829E-1)         | <b>2.465E-1 (3.422E-2)</b> | 2.88E-1 (6.96E-3)           | 5.221E-2 (1.861E-1)        | 1.152E-1 (4.68E-3)         |
|          | 6   | 2.79E+0 (6.27E-2)          | 5.783E-1 (3.385E-1)        | <b>3.490E-1 (1.26E-3)</b>  | 4.46E-1 (2.65E-2)           | 2.34E-2 (2.442E-1)         | 3.586E-1 (2.143E-2)        |
|          | 8   | 2.143E+0 (1.424E-1)        | 1.876E+0 (2.932E-1)        | 9.791E-1 (5.14E-2)         | 1.061E+0 (2.103E-2)         | 2.529E-2 (1.631E-1)        | <b>8.6947E-1 (6.49E-2)</b> |
|          | 10  | 2.870E+0 (1.31E-1)         | 2.560E+0 (4.18E-1)         | 2.228E+0 (6.241E-2)        | 1.179E+0 (1.118E-1)         | 1.59E-2 (1.601E-1)         | <b>1.1988E+0 (5.41E-2)</b> |
| MaF8     | 2   | 3.492E1 (1.81E1)           | 2.151E1 (8.26E3)           | 4.846E1 (1.99E1)           | 1.57E+0 (4.19E1)            | 5.152E1 (7.42E2)           | <b>1.897E1 (6.8E3)</b>     |
|          | 4   | 6.310E1 (2.112E1)          | 4.127E1 (1.46E2)           | 8.972E1 (2.51E1)           | 7.581E+0 (1.3E+0)           | 6.444E1 (8.17E2)           | <b>3.238E1 (1.0E2)</b>     |
|          | 6   | 5.856E1 (1.49E1)           | 6.608E1 (3.06E2)           | 9.894E1 (1.95E1)           | 1.085E+1 (2.54E+0)          | 7.551E1 (6.18E2)           | <b>4.888E1 (1.67E2)</b>    |
|          | 8   | <b>8.971E1 (5.14E3)</b>    | 2.293E+0 (4.31E1)          | 1.065E+0 (4.12E2)          | 1.945E+1 (2.06E+0)          | 1.064E+0 (1.34E1)          | 7.643E1 (3.15E2)           |
|          | 10  | <b>1.180E-2 (3.26E3)</b>   | 4.211E+0 (7.52E1)          | 1.224E+0 (8.41E2)          | 2.670E+1 (3.4E+0)           | 1.546E+0 (2.04E1)          | 1.057E+0 (3.82E2)          |
| MaF9     | 2   | 3.126E-10(2.246E-2)        | 6.715E+0(5.332E-2)         | 2.341E+0(4.127E-2)         | <b>3.834E-2(4.332E-3)</b>   | 2.458E+0(3.136E-2)         | 4.513E+0(1.217E-2)         |
|          | 4   | 4.248E+0(2.551E-2)         | 3.614E-0(2.134E-2)         | 1.431E+0(4.123E-2)         | <b>2.445E-2(3.339E-3)</b>   | 2.82E+0(3.18E-2)           | 1.588E+0(2.51E-2)          |
|          | 6   | 16243E+0(3.223E-2)         | 3.113 E-0(7.34E-2)         | 4.182E+0(2.371E-2)         | 3.33E+0(2.452E-2)           | 2.842E+0(2.644E-2)         | <b>1.032E-2(2.181E-3)</b>  |
|          | 8   | 5.783E+1(1.736E-2)         | 5.456E+0(3.134E-2)         | 2.562+0(3.452E-2)          | 1.431E+0(3.22E-2)           | 2.014E+0(1.67E-2)          | <b>1.771E-2(3.002E-3)</b>  |
|          | 10  | 2.364E+0(1.226E-2)         | 1.861E+0(4.119E-2)         | 3.164E+0(2.52E-1)          | 1.432E+0(1.223E-1)          | 1.3187E+0(4.168E-2)        | <b>1.512E-2(3.217E-3)</b>  |
| MaF10    | 2   | 1.322E+0(1.123E-2)         | 5.615E+0(4.563E-2)         | 1.221E+0(1.217E-2)         | <b>1.634E-1(4.321E-2)</b>   | 1.448E+0(2.326E-2)         | 2.173E+0(2.142E-2)         |
|          | 4   | 1.618E+0(3.106E-2)         | 1.124E-0(4.324E-2)         | 1.221E+0(1.213E-2)         | <b>2.231E-2(3.709E-3)</b>   | 2.82E+0(3.18E-2)           | 1.668E+0(2.512E-2)         |
|          | 6   | <b>2.86E-2(6.163E-3)</b>   | 2.213 E-0(4.314E-2)        | 7.812E+0(1.327E-2)         | 1.686E+0(2.142E-2)          | 2.569E+0(1.221E-2)         | 2.432E+0(2.001E-2)         |
|          | 8   | <b>4.413E-2(2.723E-3)</b>  | 2.516E+0(4.340E-2)         | 1.763+0(3.164E-2)          | 1.642E+0(4.111E-2)          | 3.981E+0(2.167E-2)         | 3.134E+0(1.537E-2)         |
|          | 10  | <b>3.064E-2(2.62E-3)</b>   | 2.351E+0(4.119E-2)         | 1.624E+0(3.532E-1)         | 2.534E+0(1.682E-1)          | 3.722E+0(5.538E-2)         | 2.549E+0(4.247E-2)         |

Table 2: HV Indicator values of 6 algorithms on test problems MaF11- MaF15 , where the best mean for each problem is highlighted

| Function | Obj | KnEA                       | NSGA-III                   | MOEA/DD                    | SPEA/R                     | RVEA                       | MSPSO                      |
|----------|-----|----------------------------|----------------------------|----------------------------|----------------------------|----------------------------|----------------------------|
| MaF11    | 2   | <b>3.205E-3 (1.618E-5)</b> | 5.327E-2 (1.401E-1)        | 2.434E-2 (3.123E-3)        | 3.8162E-3 (1.869E-4)       | 4.231E-2 (1.654E-1)        | 2.422E-3 (3.668E-4)        |
|          | 4   | 2.314E+0 (2.628E-2)        | 6.241E-1 (3.219E-1)        | 2.773E-1 (4.268E-3)        | 2.828E-1 (4.926E-3)        | 3.241E-2 (1.541E-1)        | <b>2.426E-2 (3.52E-3)</b>  |
|          | 6   | 1.668E+0 (2.127E-2)        | 4.383E-1 (2.365E-1)        | 3.186E-1 (2.133E-2)        | <b>5.646E-2 (2.162E-3)</b> | 1.444E-2 (2.412E-1)        | 4.872E-1 (1.624E-3)        |
|          | 8   | 2.148E+0 (1.455E-1)        | 1.436E+0 (2.332E-1)        | 1.261E+0 (2.153E-2)        | <b>4.661E-2 (2.514E-3)</b> | 2.429E-2 (2.631E-1)        | 8.227E-1 (3.419E-2)        |
|          | 10  | 2.566E+0 (1.342E-1)        | 1.763E+0 (3.418E-1)        | 2.719E+0 (1.128E-1)        | <b>1.223E-2 (6.41E-3)</b>  | 1.849E-2 (1.5161E-1)       | 1.148E+0 (3.451E-2)        |
| MaF12    | 2   | 5.162E-3 (2.38E-3)         | <b>4.189E-3 (1.46E-5)</b>  | 5.465E-3 (2.169E-4)        | 2.421E-2 (3.641E-1)        | 4.183E-3 (1.349E-4)        | 4.239E-2 (1.203E-3)        |
|          | 4   | 2.311E-2 (4.282E-3)        | <b>2.628E-3 (3.246E-5)</b> | 1.556E-2 (1.204E-3)        | 4.653E-2 (1.117E-2)        | 8.166E-3 (1.129E-3)        | 5.313E-2 (3.152E-2)        |
|          | 6   | 3.447E-2 (2.524E-3)        | 5.712E-2 (1.341E-2)        | 1.216E-2 (1.46E-3)         | 2.384E-1 (2.536E-2)        | <b>3.165E-2 (4.318E-4)</b> | 3.196E-1 (4.223E-2)        |
|          | 8   | 2.246E-2 (3.356E-3)        | 4.185E-2 (3.465E-2)        | 1.241E-1 (3.721E-2)        | 3.567E-1 (6.143E-2)        | <b>2.543E-2 (2.124E-4)</b> | 3.521E-2 (3.615E-2)        |
|          | 10  | 2.815E-2 (2.637E-3)        | 4.101E-2 (3.531E-2)        | 3.442E-1 (5.417E-2)        | 4.126E-1 (3.122E-2)        | <b>2.638E-2 (4.147E-4)</b> | 2.415E-1 (3.321E-2)        |
| MaF13    | 2   | 1.261E-3 (2.122E-4)        | 3.5751E-1 (3.218E-1)       | 8.215E-3 (5.004E-4)        | <b>3.183E-3 (3.710E-5)</b> | 4.871E-1 (2.128E-1)        | 5.260E-2 (4.281E-3)        |
|          | 4   | 2.21E-1 (4.320E-3)         | 4.153E-1 (2.12E-1)         | 1.1423E-1 (6.240E-2)       | 2.346E-1 (6.322E-2)        | <b>5.161E-2 (2.312E-3)</b> | 2.261E-1 (3.164E-3)        |
|          | 6   | 2.35E-1 (1.127E-1)         | 3.38E-1 (8.219E-2)         | 2.150E-1 (1.867E-3)        | 2.176E-1 (3.871E-3)        | <b>2.572E-2 (1.420E-4)</b> | 2.769E-1 (3.295E-3)        |
|          | 8   | 4.719E-1 (2.601E-2)        | 6.825E-1 (6.185E-2)        | 3.617E-1 (1.296E-3)        | 3.122E-1 (3.412E-3)        | <b>3.312E-2 (2.622E-4)</b> | 3.129E-2 (3.245E-3)        |
|          | 10  | 7.536E-1 (1.49E-2)         | 3.380E-1 (3.624E-2)        | 3.4736E-1 (1.338E-3)       | 4.124E-1 (2.119E-2)        | 3.291E-1 (2.024E-3)        | <b>2.355E-2 (1.627E-3)</b> |
| MaF14    | 2   | 1.330E1 (2.217E1)          | 2.663E1 (4.118E2)          | 4.436E1 (3.314E1)          | <b>1.449E2 (2.419E3)</b>   | 5.382E1 (2.742E1)          | 1.913E1 (1.021E1)          |
|          | 4   | 2.243E1 (3.541E1)          | 3.323E1 (2.421E2)          | 5.418E1 (2.860E1)          | 3.2147E1 (3.972E2)         | 26657E1 (3.105E1)          | <b>2.154E2 (9.750E3)</b>   |
|          | 6   | 6.445E1 (2.67E1)           | 7.541E1 (1.6221)           | 4.672E1 (1.512E1)          | 3.395E1 (1.621E2)          | 6.378E1 (1.436E1)          | <b>3.224E2 (2.063E3)</b>   |
|          | 8   | 4.759E1 (3.128E1)          | 1.765E+1 (2.424E1)         | 5.579E1 (4.141E2)          | 5.400E1 (2.45E2)           | 6.420E-1 (5.634E2)         | <b>3.122E2 (4.152E3)</b>   |
|          | 10  | 3.267E1 (9.241E2)          | 8.636E1 (2.724E1)          | 1.174E+0 (6.232E2)         | 4.168E1 (4.15E2)           | 4.21E1 (8.74E2)            | <b>3.248E2 (2.229E3)</b>   |
| MaF15    | 2   | 3.722E-2 (3.521E-1)        | <b>4.205E-3 (1.842E-5)</b> | 6.592E-3 (4.280E-3)        | 3.422E-3 (1.419E-4)        | 3.231E-2 (1.560E-1)        | 2.442E-2 (2.263E-3)        |
|          | 4   | 3.614E+0 (3.821E-2)        | 6.242E-1 (4.818E-1)        | <b>2.665E-1 (2.422E-2)</b> | 2.421E-1 (5.946E-3)        | 2.221E-2 (1.861E-1)        | 1.152E-1 (4.68E-3)         |
|          | 6   | 2.524E+0 (4.227E-2)        | 5663E-1 (2.385E-1)         | <b>3.490E-2 (1.26E-3)</b>  | 3.426E-1 (2.651E-2)        | 2.534E-2 (2.442E-1)        | 3.486E-2 (2.343E-2)        |
|          | 8   | 2.243E+0 (1.424E-1)        | 1.876E+0 (2.932E-1)        | 6.781E-1 (5.14E-2)         | 1.061E+0 (2.103E-2)        | 2.529E-2 (1.631E-1)        | <b>3.646E-2 (3.490E-3)</b> |
|          | 10  | 2.361E+0 (1.31E-1)         | 2.560E+0 (4.18E-1)         | 2.228E+0 (6.241E-2)        | 1.179E+0 (1.118E-1)        | 1.580E-2 (1.637E-1)        | <b>1.668E-2 (3.341E-3)</b> |

Table 3: ZDT Test Suite used for evaluation of MSPSO

| No | Function Name | Objective Functions                                                                                                                                                                          | Search Domain                           |
|----|---------------|----------------------------------------------------------------------------------------------------------------------------------------------------------------------------------------------|-----------------------------------------|
| 1  | ZDT1          | $f_1(x) = x_1, f_2 = g \cdot (1.0 - \sqrt{f_1/g}),$ $g = 1.0 + \frac{9}{n-1} \sum_{i=2}^n x_i, 0 \leq x_i \leq 1, i = 1, 2, \dots, n$                                                        | $0 \leq x_i \leq 1,$ $1 \leq i \leq 30$ |
| 2  | ZDT2          | $f_1(x) = x_1, f_2 = g(x) \cdot \left(1.0 - \left(\frac{x_1}{g(x)}\right)^2\right)$ $g(x) = 1.0 + \frac{9}{n-1} \sum_{i=2}^n x_i, 0 \leq x_i \leq 1, i = 1, 2, \dots, n$                     | $0 \leq x_i \leq 1,$ $1 \leq i \leq 30$ |
| 3  | ZDT3          | $f_1(x) = x_1, f_2 = g(x) \cdot \left(1.0 - \sqrt{\frac{x_1}{g(x)}} - \frac{x_1}{g(x)} \sin(10\pi x_1)\right),$ $g(x) = 1.0 + \frac{9}{n-1} \sum_{i=2}^n x_i,$                               | $0 \leq x_i \leq 1,$ $1 \leq i \leq 30$ |
| 4  | ZDT4          | $f_1(x) = x_1, f_2 = g(x) \cdot \left(1.0 - \sqrt{\frac{x_1}{g(x)}}\right),$ $g(x) = 1.0 + 10(n-1) + \sum_{i=2}^n (x_i^2 - 10 \cos(4\pi x_i)),$                                              | $0 \leq x_i \leq 1,$ $1 \leq i \leq 30$ |
| 6  | ZDT6          | $f_1(x) = 1 - e^{-4x_1} \sin^6(6\pi x_1),$ $f_2(x) = g(x) \cdot \left(1 - \left(\frac{f_1(x)}{g(x)}\right)^2\right),$ $g(x) = 1 + 9 \left(\frac{\sum_{i=2}^n x_i}{n-1}\right)^{\frac{1}{4}}$ | $0 \leq x_i \leq 1,$ $1 \leq i \leq 30$ |

Table 4: DTZ Test Suite used for evaluation of MSPSO

| No | Function Name | Objective Functions                                                                                                                                                                                                                                                                   | Search Domain                                              |
|----|---------------|---------------------------------------------------------------------------------------------------------------------------------------------------------------------------------------------------------------------------------------------------------------------------------------|------------------------------------------------------------|
| 1  | DTLZ1         | $f_1(x) = \frac{1}{2}x_1x_2(1 + g(x)),$ $g(x) = 100 \left( 10 + \sum_{i=3}^n (x_i - 0.5)^2 - \cos(20\pi(x_i - 0.5)) \right),$ $f_2(x) = \frac{1}{2}x_1(1 - x_2)(1 + g(x))$                                                                                                            | $n = 12,$<br>$0 \leq x_i \leq 1,$<br>$1 = 1, 2, \dots, 12$ |
| 2  | DTLZ2         | $f_1(x) = (1 + g(x)\prod_{i=1}^2 \cos(y_i \frac{\pi}{2})),$ $f_2(x) = (1 + g(x)(\prod_{i=1}^2 \cos(y_i \frac{\pi}{2}) \sin(y_2 \frac{\pi}{2})))$ $f_3(x) = (1 + g(x)) \sin(y_1 \frac{\pi}{2}), g(x) = \sum_{i=1}^n (x_i - 0.5)^2$                                                     | $n = 12,$<br>$0 \leq x_i \leq 1,$<br>$1 = 1, 2, \dots, 12$ |
| 3  | DTLZ3         | $f_1(x) = (1 + g(x)\prod_{i=1}^2 \cos(y_i \frac{\pi}{2})),$ $f_2(x) = (1 + g(x)(\prod_{i=1}^2 \cos(y_i \frac{\pi}{2}) \sin(y_2 \frac{\pi}{2}))),$ $f_3(x) = (1 + g(x)) \sin(y_1 \frac{\pi}{2}),$ $g(x) = 100 \left( 10 + \sum_{i=3}^n (x_i - 0.5)^2 - \cos(20\pi(x_i - 0.5)) \right)$ | $n = 12,$<br>$0 \leq x_i \leq 1,$<br>$1 = 1, 2, \dots, 12$ |
| 4  | DTLZ7         | $f_1(x) = x_1, f_2(x) = x_2, f_3(x) = (1 + g(x)) \cdot h(f_1(x),$ $f_2(x), g(x)), g(x) = 1 + \frac{9}{22} \sum_{i=3}^n x_i$ $h(f_1(x), f_2(x), g(x)) = 3 - \sum_{i=1}^2 \left( \frac{f_i(x)}{1 + g(x)} (1 + \sin(3\pi f_i(x))) \right)$                                               | $n = 12,$<br>$0 \leq x_i \leq 1,$<br>$1 = 1, 2, \dots, 12$ |

Table 5: Parameter Specifications of the proposed algorithm for ZDT test suite

| Test Function | Population                          | Parameter Specification                                                                                                |
|---------------|-------------------------------------|------------------------------------------------------------------------------------------------------------------------|
| ZDT1          | 20 particles per objective function | $N = 2, M = 20$ per objective function, $Max = 10000, C3 = 2, V_{max} = +.2, V_{min} = -.2, Neighborhood = 21, P = 40$ |
| ZDT2          | 20 particles per objective function | $N = 2, M = 20$ per objective function, $Max = 10000, C3 = 2, V_{max} = +.2, V_{min} = -.2, Neighborhood = 21, P = 40$ |
| ZDT3          | 20 particles per objective function | $N = 2, M = 20$ per objective function, $Max = 10000, C3 = 2, V_{max} = +.2, V_{min} = -.2, Neighborhood = 21, P = 40$ |
| ZDT4          | 20 particles per objective function | $N = 2, M = 20$ per objective function, $Max = 10000, C3 = 2, V_{max} = +.2, V_{min} = -.2, Neighborhood = 21, P = 40$ |
| ZDT6          | 20 particles per objective function | $N = 2, M = 20$ per objective function, $Max = 10000, C3 = 2, V_{max} = +.2, V_{min} = -.2, Neighborhood = 21, P = 40$ |

Table 6: Parameter Specifications of the proposed algorithm for DTLZ test suite

| Test Function | Population                          | Parameter Specification                                                                                                 |
|---------------|-------------------------------------|-------------------------------------------------------------------------------------------------------------------------|
| DTLZ1         | 20 particles per objective function | $N = 2, M = 20$ per objective function, $Max = 10000, C3 = 2, V_{max} = -+.2, V_{min} = -.4, Neighborhood = 22, P = 60$ |
| DTLZ2         | 20 particles per objective function | $N = 2, M = 20$ per objective function, $Max = 10000, C3 = 2, V_{max} = -+.2, V_{min} = -.4, Neighborhood = 22, P = 60$ |
| DTLZ3         | 20 particles per objective function | $N = 2, M = 20$ per objective function, $Max = 10000, C3 = 2, V_{max} = -+.2, V_{min} = -.4, Neighborhood = 22, P = 60$ |
| DTLZ7         | 20 particles per objective function | $N = 2, M = 20$ per objective function, $Max = 10000, C3 = 2, V_{max} = -+.2, V_{min} = -.4, Neighborhood = 22, P = 60$ |

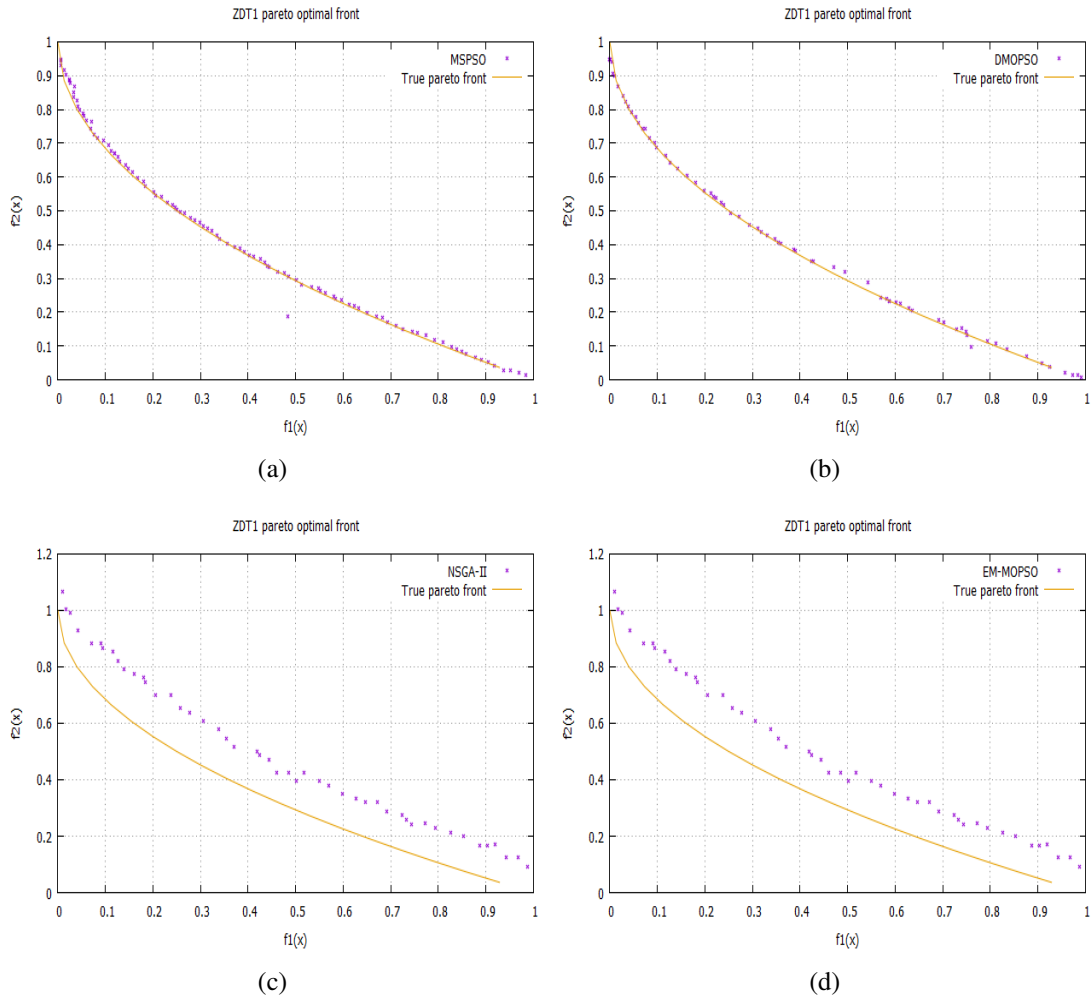

Figure 1: (a)-(d) Pareto front produced by different algorithms on ZDT1 Test function

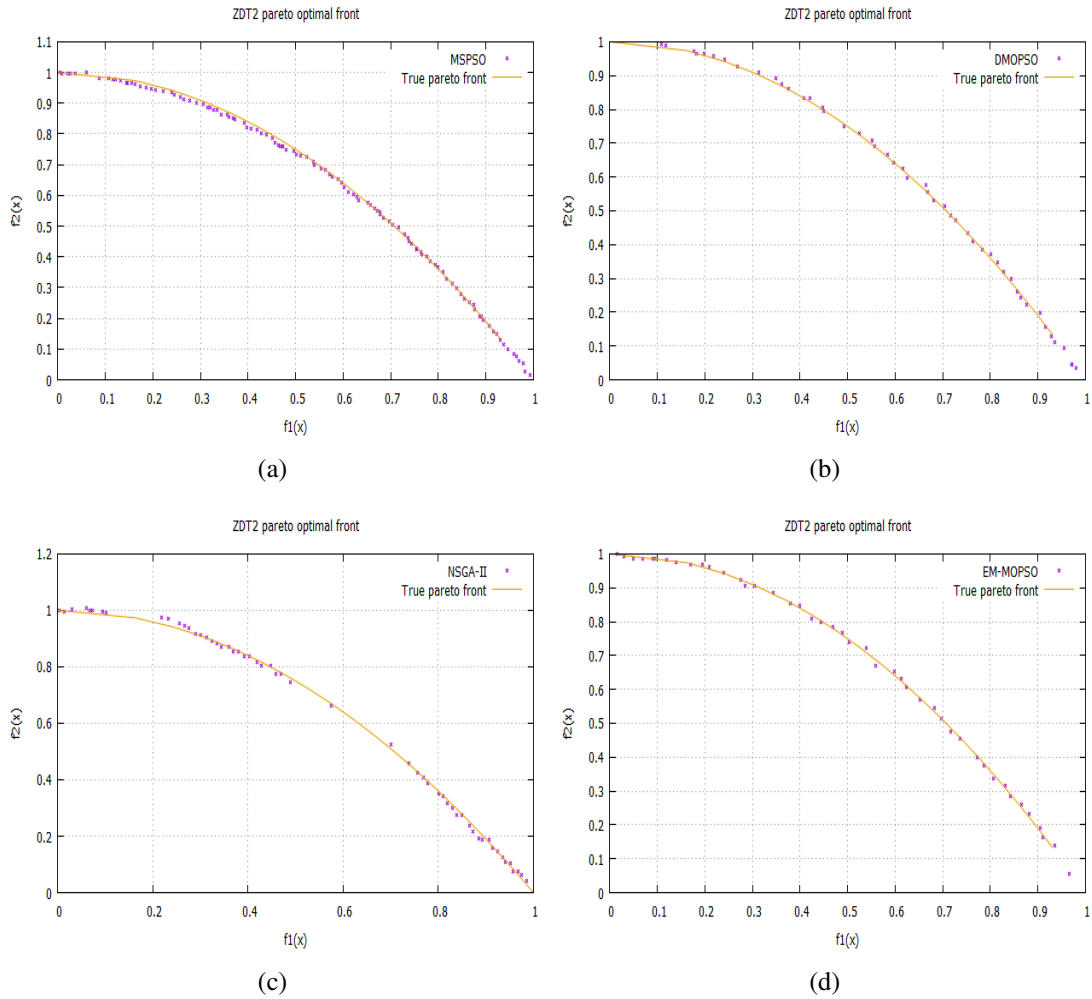

Figure 2: (a)-(d) Pareto front produced by different algorithms on ZDT2 Test function

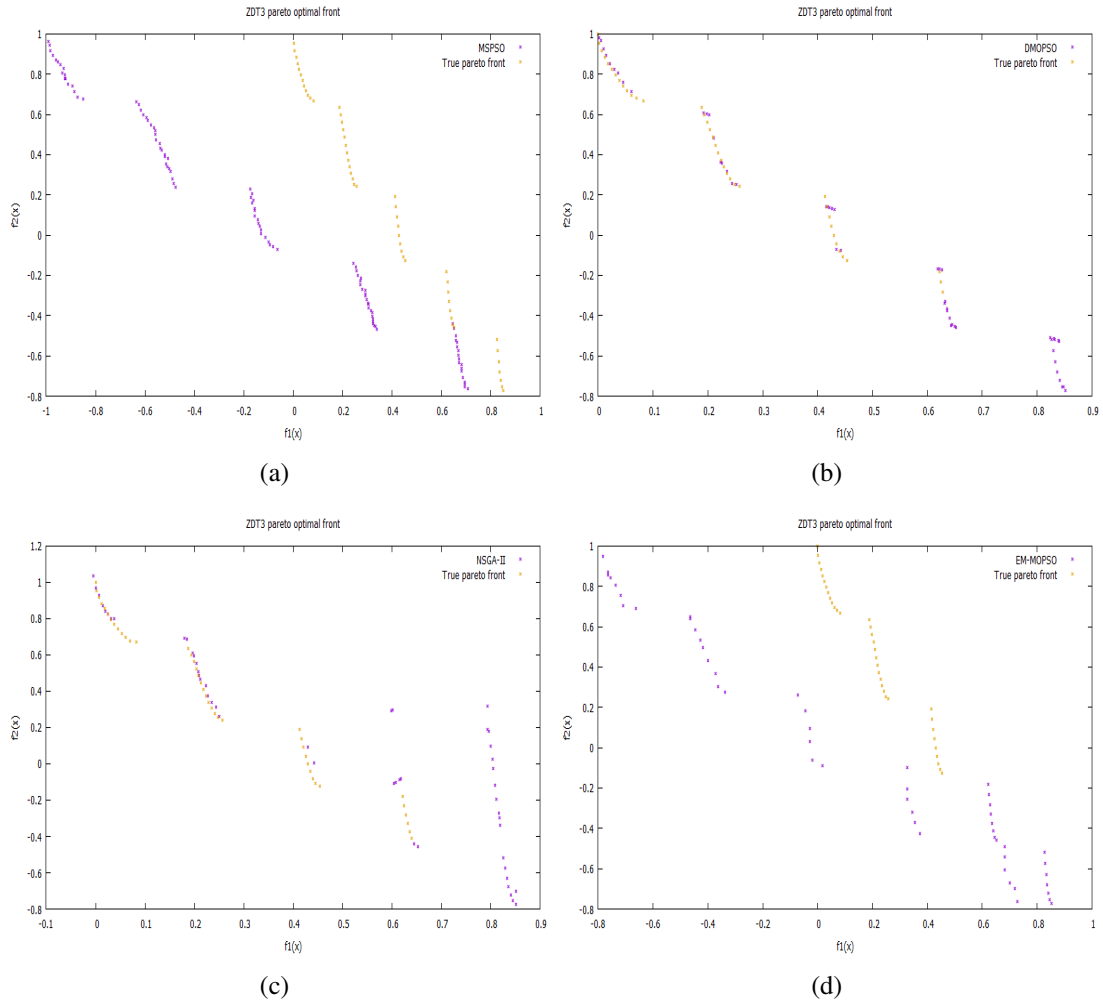

Figure 3: (a)-(d) Pareto front produced by different algorithms on ZDT3 Test function



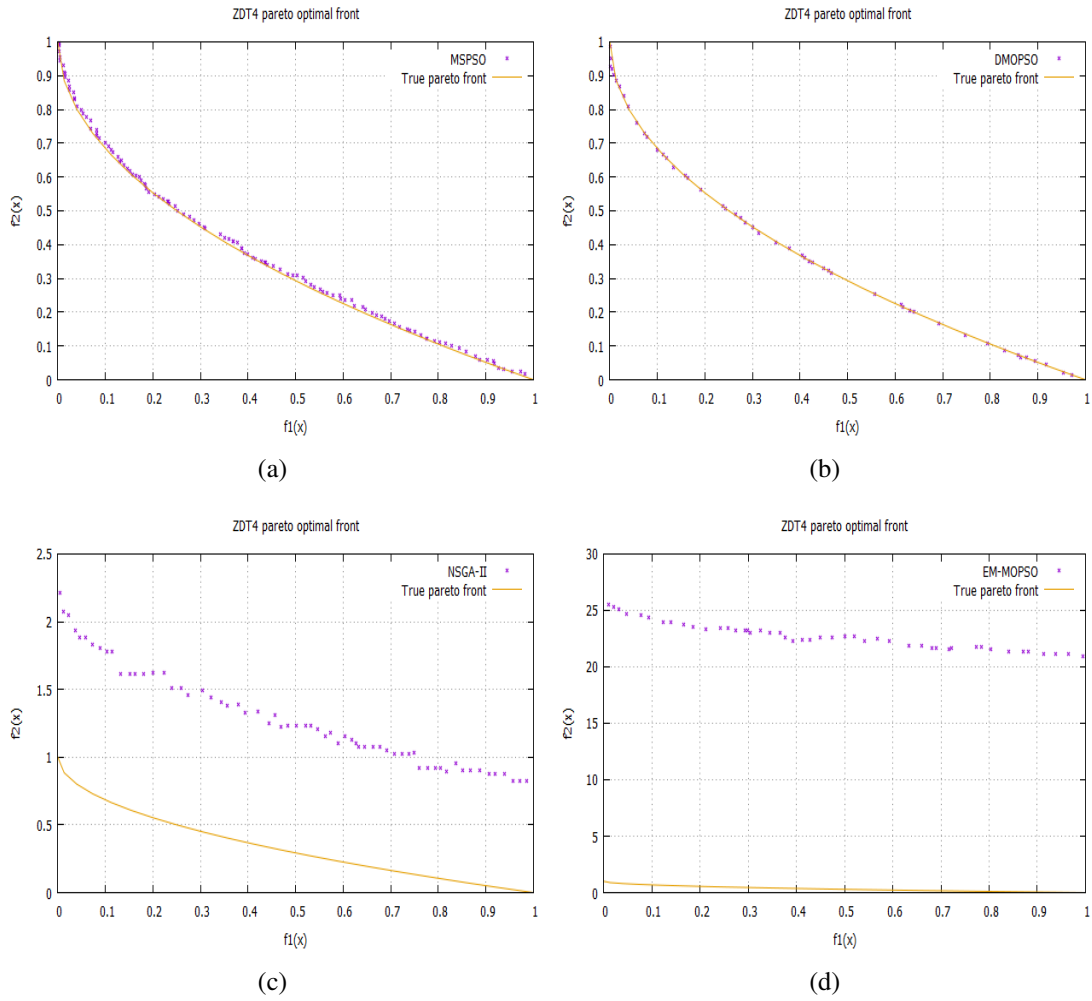

Figure 4: (a)-(d) Pareto front produced by different algorithms on ZDT4 Test function

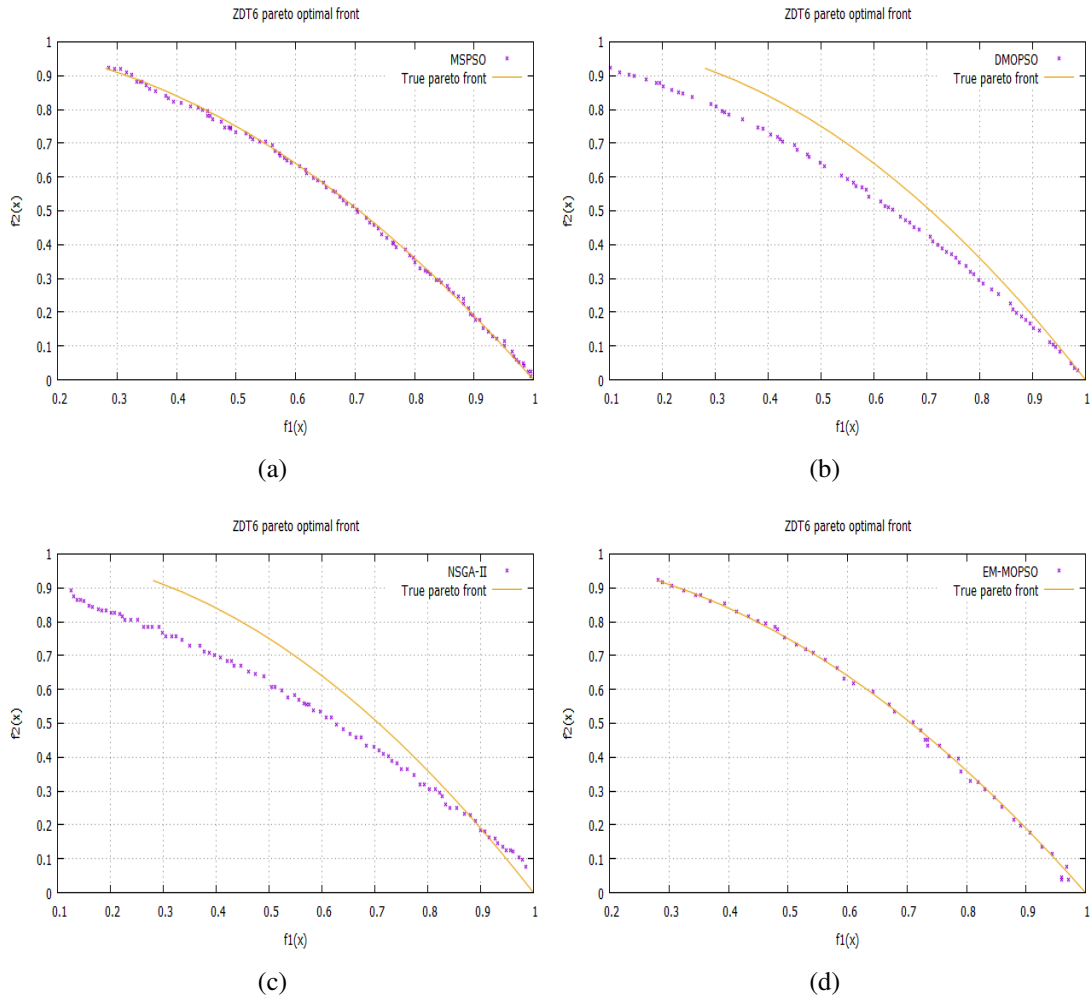

Figure 5: (a)-(d) Pareto front produced by different algorithms on ZDT6 Test function

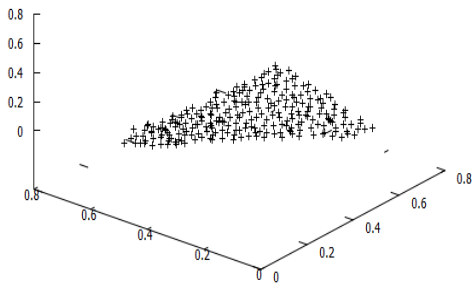

(a) MSPSO

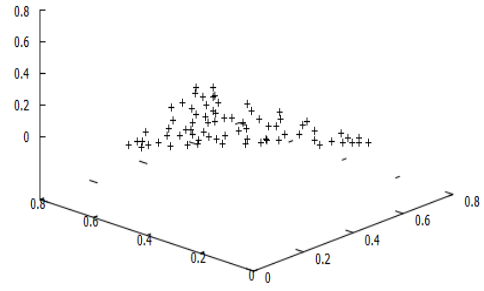

(b) NSGA-II

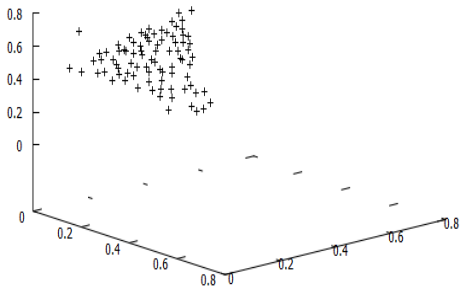

(c) DMOPSO

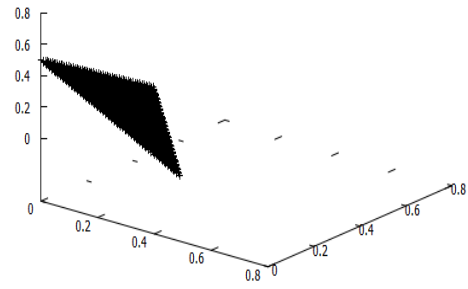

(d) True Front

Figure 6: Pareto front on DTLZ1 Test function

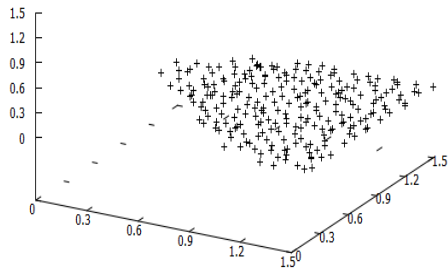

(a) MSPSO

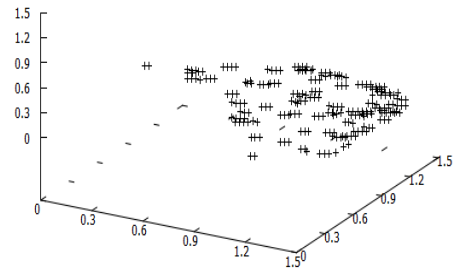

(b) NSGA-II

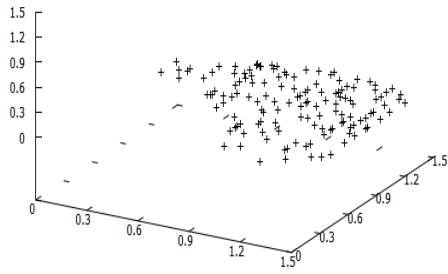

(c) DMOPSO

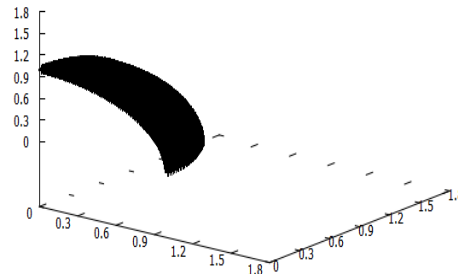

(d) True Front

Figure 7: Pareto front on DTLZ2 Test function

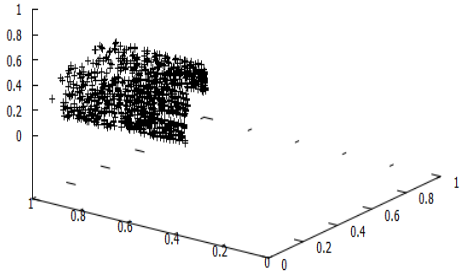

(a) MSPSO

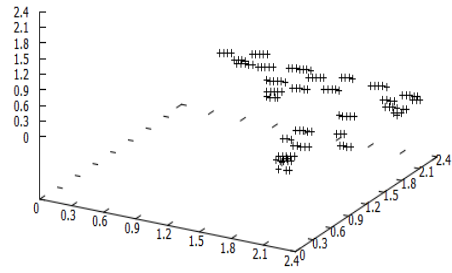

(b) NSGA-II

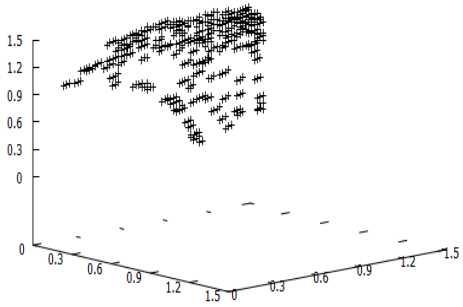

(c) DMOPSO

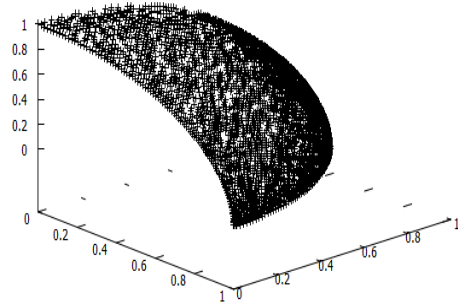

(d) True Front

Figure 8: Pareto front on DTLZ3 Test function

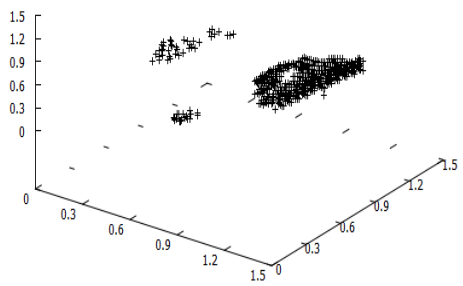

(a) MSPSO

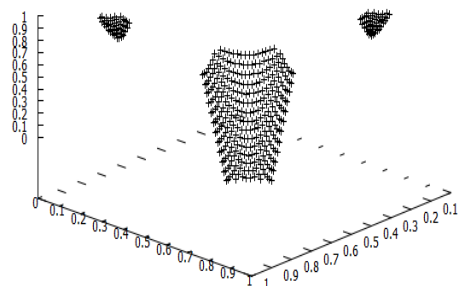

(b) True Front

Figure 9: Pareto front on DTLZ7 Test function

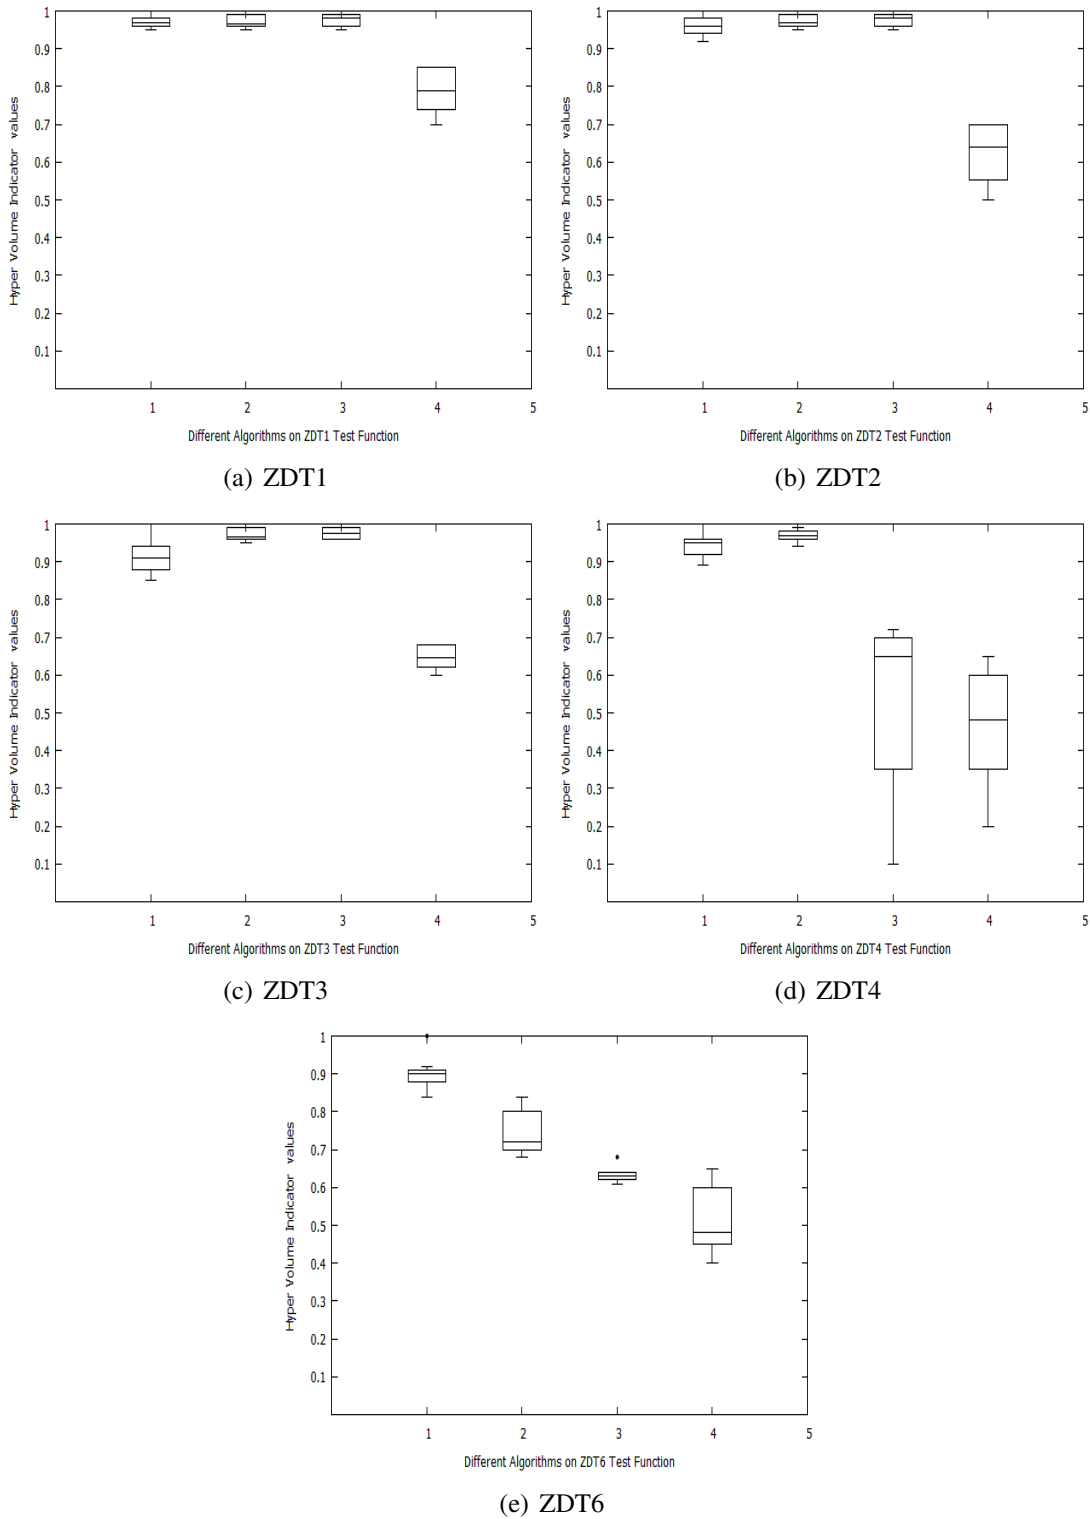

Figure 10: Box Plot of Hyper Volume Indicator ( $I_H$ ) values of different algorithms on ZDT Test Functions. Values 1 to 4 on the plot represent algorithms, MSPSO, DMOPSO, NSGA-II, EM-MOPSO respectively

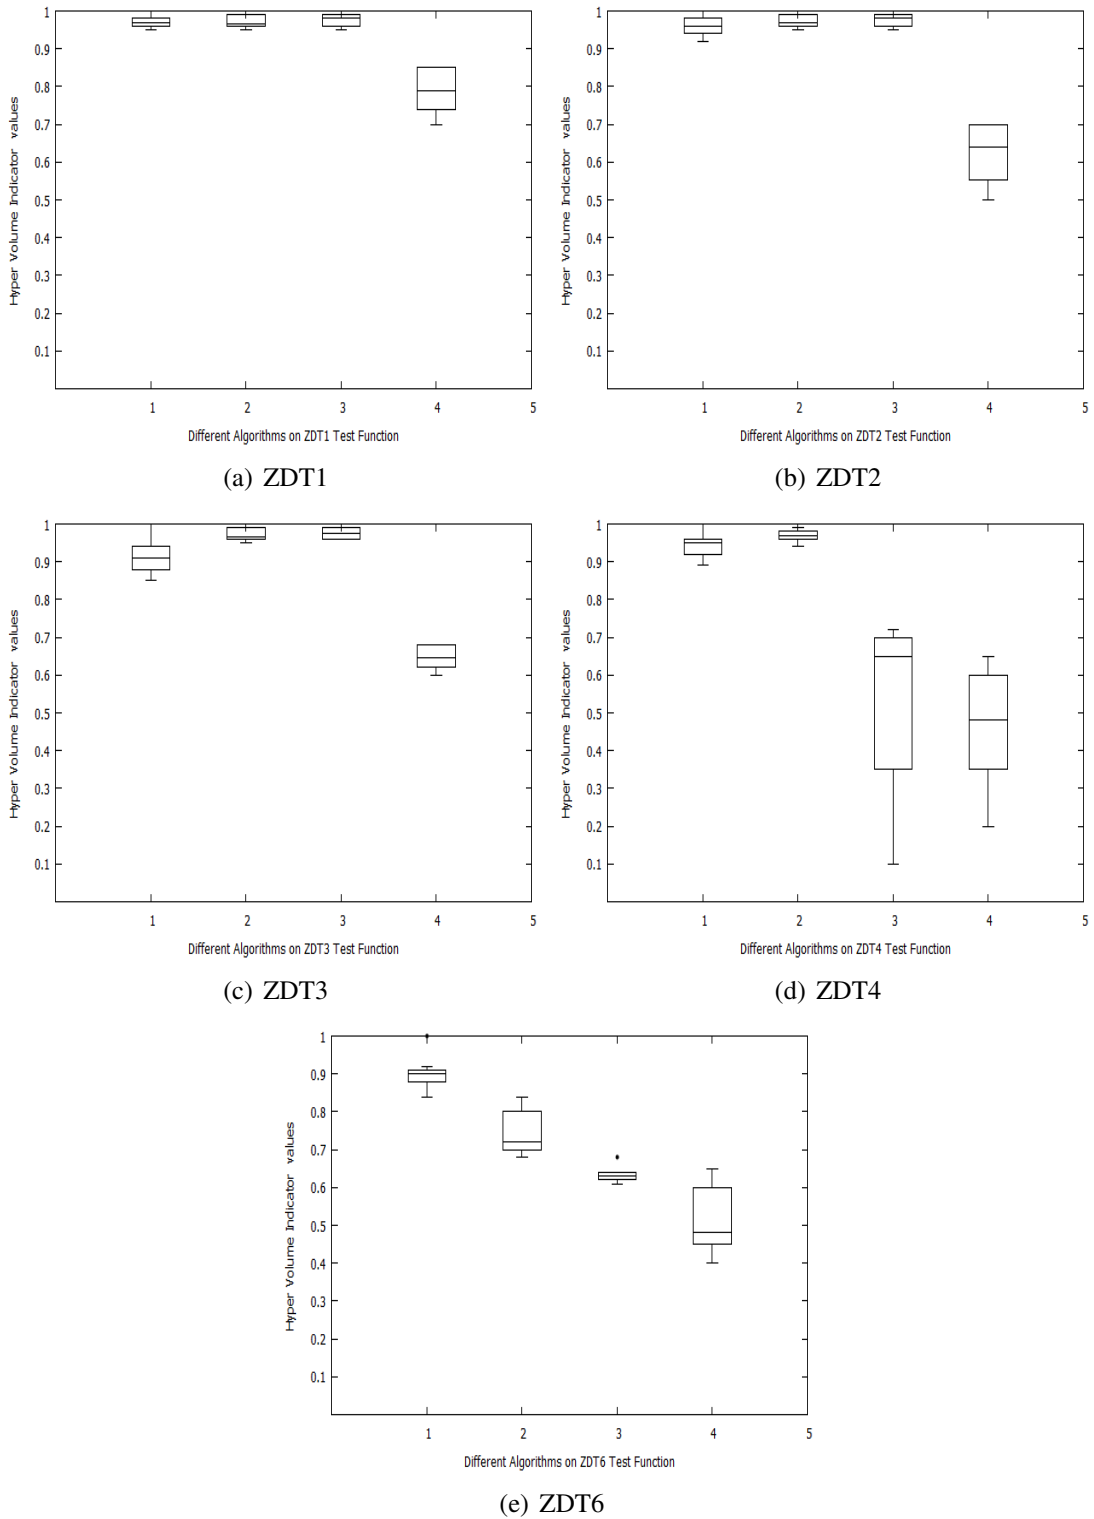

Figure 11: Box Plot of Hyper Volume Indicator ( $I_H$ ) values of different algorithms on ZDT Test Functions. Values 1 to 4 on the plot represent algorithms, MSPSO, DMOPSO, NSGA-II, EM-MOPSO respectively

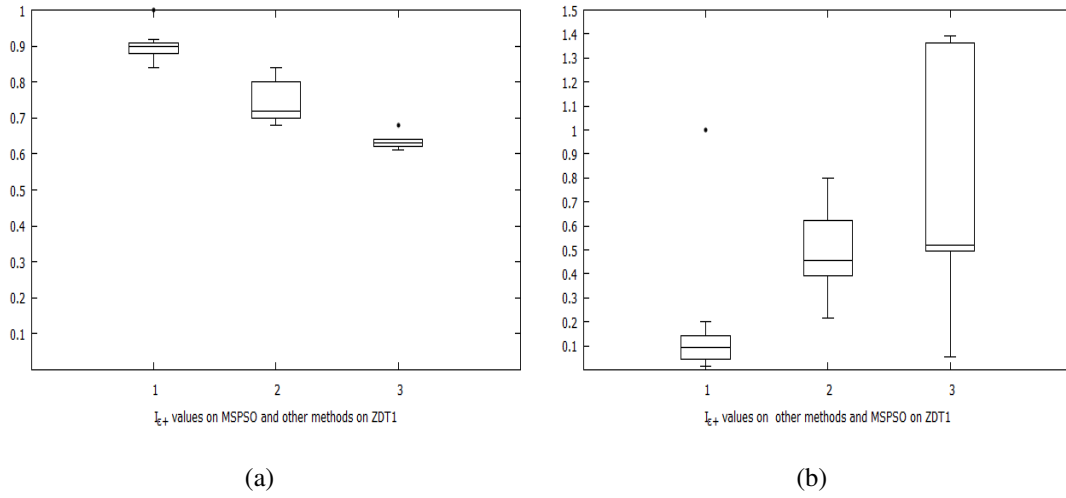

Figure 12: Box Plot based on  $I_{\epsilon}^{+}$  values of different algorithms on test function ZDT1. 1,2,3 values on x-axis represents  $I_{\epsilon}^{+}$  values of MSPSO with DMOPSO, NSGA-II and EM-MOPSO respectively.

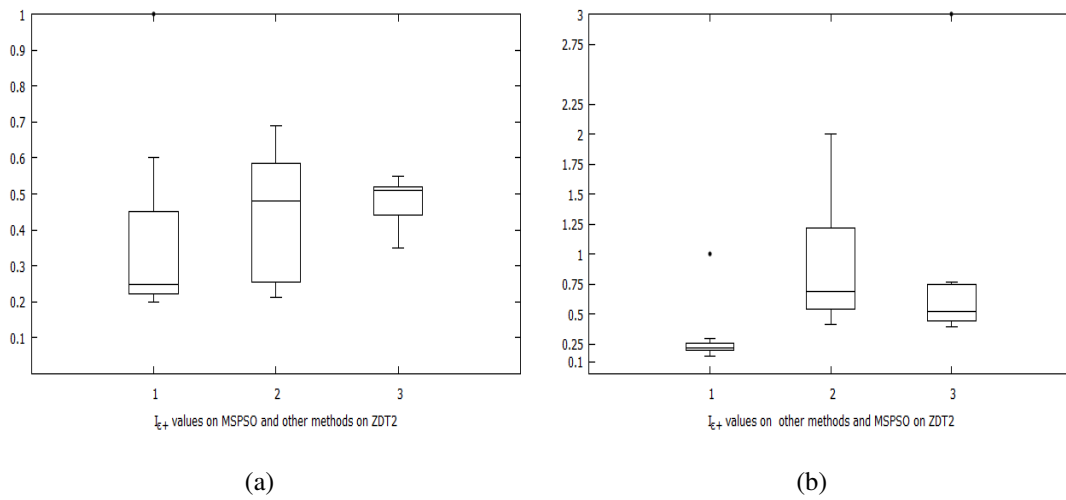

Figure 13: Box Plot based on  $I_{\epsilon}^{+}$  values of different algorithms on test function ZDT2. 1,2,3 values on x-axis represents  $I_{\epsilon}^{+}$  values of MSPSO with DMOPSO, NSGA-II and EM-MOPSO respectively.



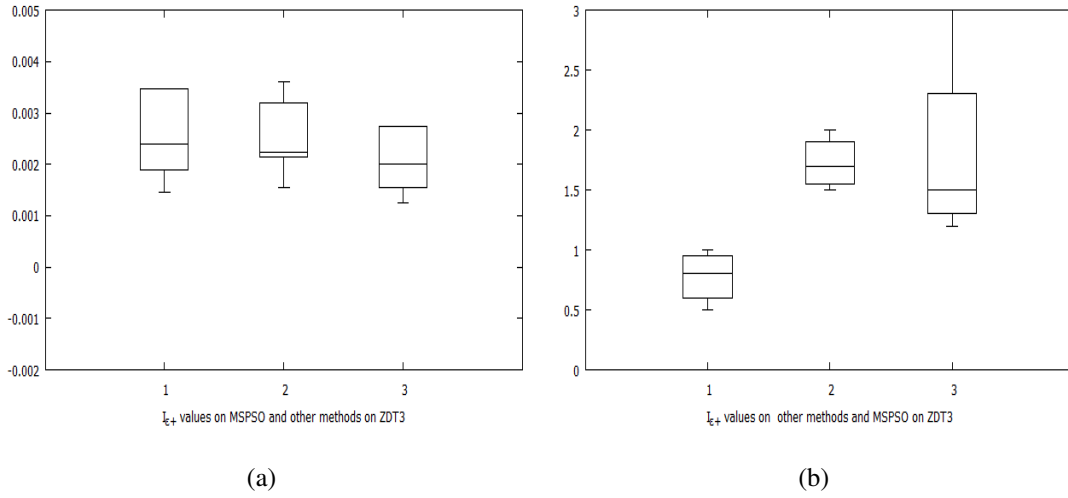

Figure 14: Box Plot based on  $I_{\epsilon}^{+}$  values of different algorithms on test function ZDT3. 1,2,3 values on x-axis represents  $I_{\epsilon}^{+}$  values of MSPSO with DMOPSO, NSGA-II and EM-MOPSO respectively.

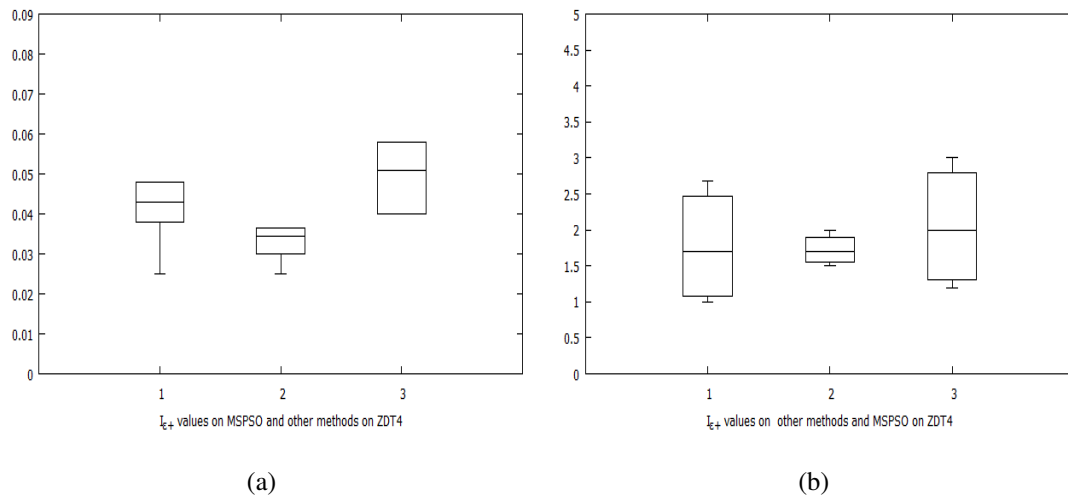

Figure 15: Box Plot based on  $I_{\epsilon}^{+}$  values of different algorithms on test function ZDT4. 1,2,3 values on x-axis represents  $I_{\epsilon}^{+}$  values of MSPSO with DMOPSO, NSGA-II and EM-MOPSO respectively.

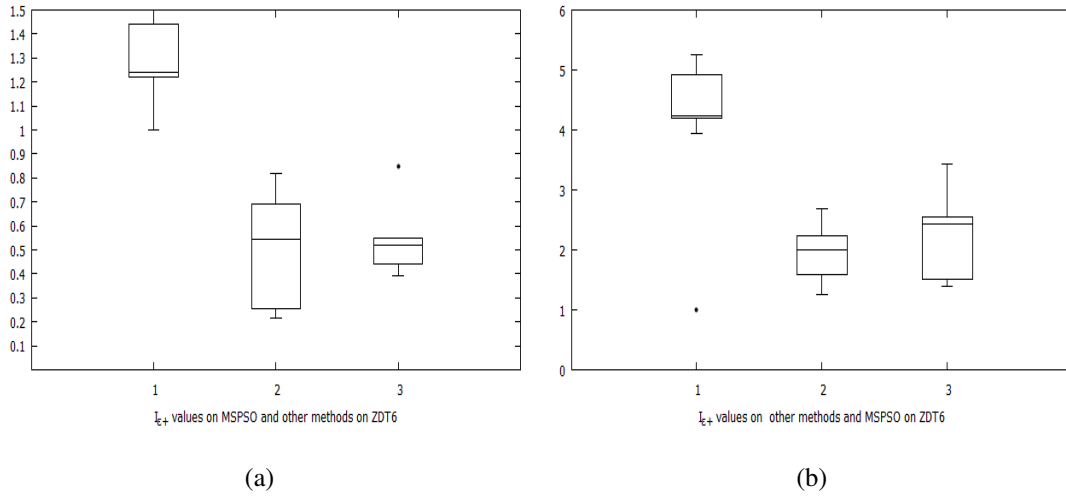

Figure 16: Box Plot based on  $I_{\epsilon}^{+}$  values of different algorithms on test function ZDT6. 1,2,3 values on x-axis represents  $I_{\epsilon}^{+}$  values of MSPSO with DMOPSO, NSGA-II and EM-MOPSO respectively.

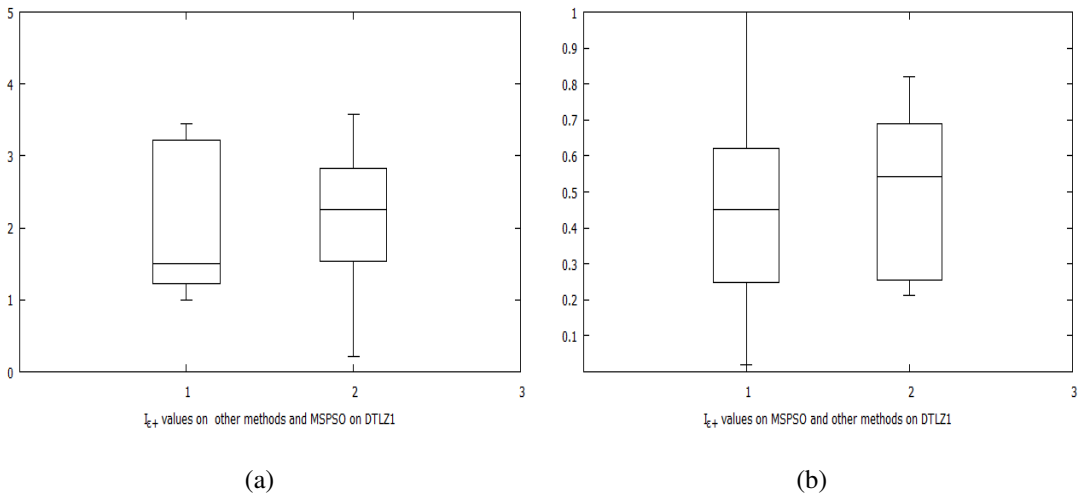

Figure 17: Box Plot based on  $I_{\epsilon}^{+}$  values of different algorithms on test function DTLZ1. 1,2,3 values on x-axis represents  $I_{\epsilon}^{+}$  values of MSPSO with DMOPSO, NSGA-II respectively.

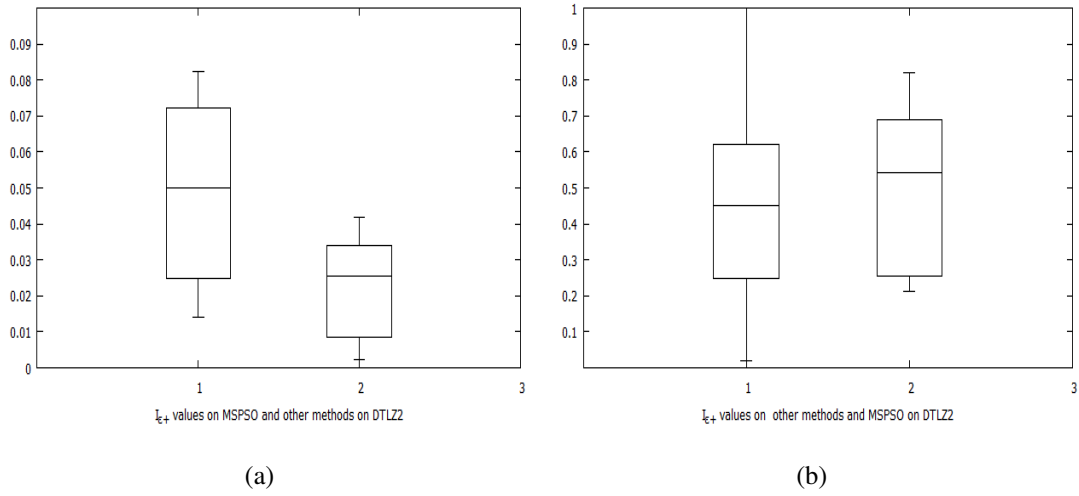

Figure 18: Box Plot based on  $I_{\epsilon}^+$  values of different algorithms on test function DTLZ2. 1,2,3 values on x-axis represents  $I_{\epsilon}^+$  values of MSPSO with DMOPSO, NSGA-II respectively.

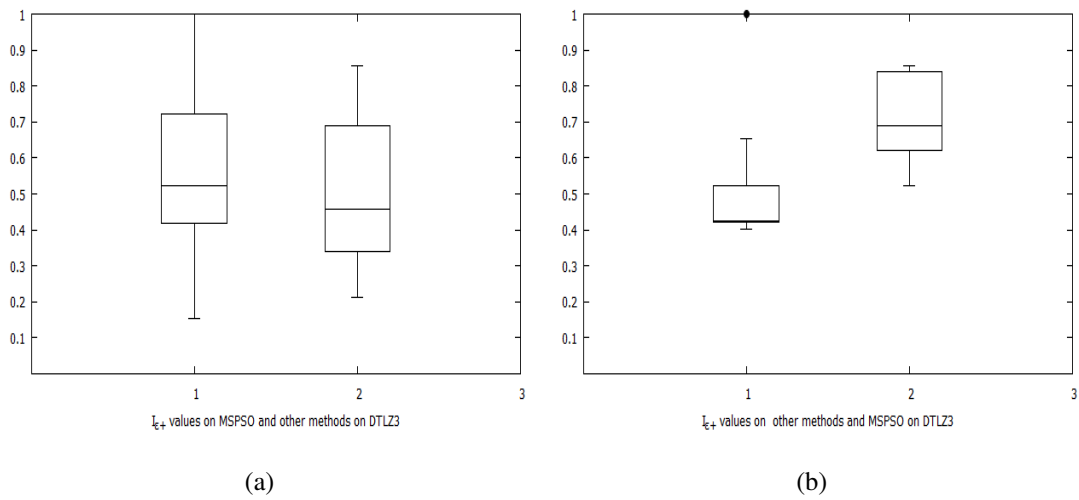

Figure 19: Box Plot based on  $I_{\epsilon}^+$  values of different algorithms on test function DTLZ3. 1,2,3 values on x-axis represents  $I_{\epsilon}^+$  values of MSPSO with DMOPSO, NSGA-II respectively.
